# Supplementary material
Source: Springer Nature journal article supplement (https://www.springermedizin.de/resource/supplementary/12960_2006_73_MOESM3_ESM.pdf/9570408)

**Self-reported 'main reason' for migration to the UK**

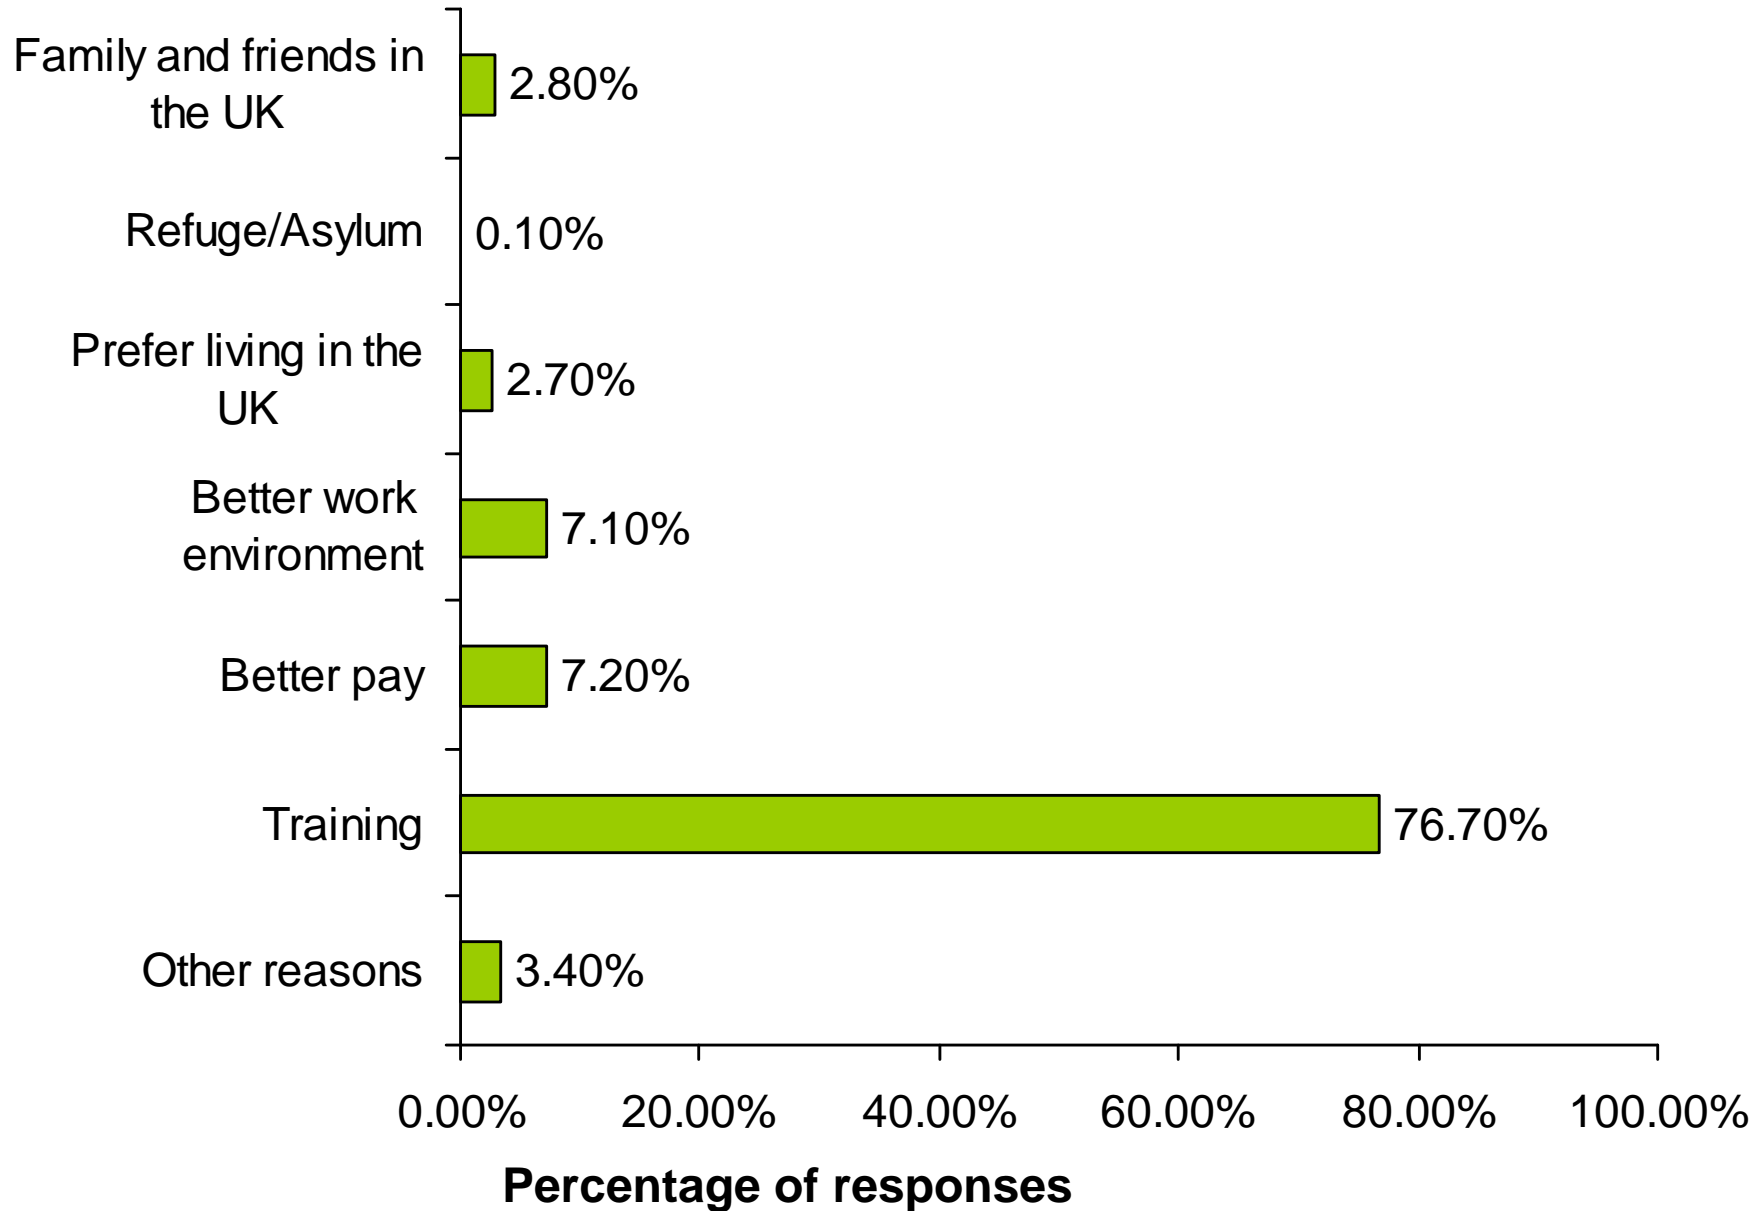

Supplement: MOESM3 [file 9570408]
